# Supplementary material for: Serum proteomic analysis of melanoma patients with immunohistochemical profiling of primary melanomas and cultured cells: Pilot study
Source: PubMed Central journal article supplement — Oncol Rep. 2019 Sep 17;42(5):1793–804. doi: 10.3892/or.2019.7319 (PMC6787991; doi:10.3892/or.2019.7319), 2019-09-17
Supplement: Supplementary_Data.pdf [file Supplementary_Data.pdf]

Table SI. Antibodies used for immunohistochemical and immunocytochemical analysis.

| A, Primary antibodies                                                                                      |                                   |
|------------------------------------------------------------------------------------------------------------|-----------------------------------|
| Antibody (clone no.), dilution                                                                             | Supplier                          |
| IL-6 (ab9324), MoMoAb, 1:500                                                                               | Abcam                             |
| IL-8 (807), MoMoAb, 1:500                                                                                  | Abcam                             |
| IL-6R (ab128008), RaPoAb, 1:100                                                                            | Abcam                             |
| VEGF-R1 (ab2350), RaPoAb, 1:100                                                                            | Abcam                             |
| VEGF (EP116Y), RaMoAb, 1:100                                                                               | BioCare Medical                   |
| CXCR1/IL-8 RA (42705), MoMoAb, 1:100                                                                       | R&D Systems, Inc.                 |
| CXCR1/IL-8 RB (48311), MoMoAb, 1:50                                                                        | R&D Systems, Inc.                 |
| VEGF-R2 (55B11), RaMoAb, 1:500                                                                             | Cell Signaling Technology, Inc.   |
| S100 (Z0311), RaPoAb, 1:100                                                                                | Dako; Agilent Technologies, Inc.  |
| HMB45 (clone HMB-45), MoMoAb, 1:100                                                                        | Dako; Agilent Technologies, Inc.  |
| MiTf (Clone D5), MoMoAb, 1:100                                                                             | Dako; Agilent Technologies, Inc.  |
| Vimentin (clone V9), MoMoAb, 1:100                                                                         | Dako; Agilent Technologies, Inc.  |
| B, Secondary antibodies                                                                                    |                                   |
| Antibody (clone no.)                                                                                       | Supplier                          |
| <i>N</i> -Histofine Simple Stain MAX PO (414152F)                                                          | EXBIO Olomouc s.r.o.              |
| C, Chromogen                                                                                               |                                   |
| Name                                                                                                       | Supplier                          |
| DCS ChromoLine AEC                                                                                         | DCS Innovative Diagnostik-Systeme |
| MoMoAb, Mouse Monoclonal Antibody; RaMoAb, Rabbit Monoclonal Antibody; RaPoAb, Rabbit Polyclonal Antibody. |                                   |
